1 Deposited as pre-print on *medRxiv*

2  
3  
4 **Monitoring SARS-CoV-2 in sewage:**  
5 **toward sentinels with analytical accuracy**

6  
7 David Calderón-Franco<sup>a</sup>, Laura Orschler<sup>b</sup>, Susanne Lackner<sup>b</sup>, Shelesh Agrawal<sup>b,§</sup>,

8 David G. Weissbrodt<sup>a,§,\*</sup>

9  
10  
11 <sup>a</sup>Department of Biotechnology, Delft University of Technology, van der Maasweg 9, 2629 HZ

12 Delft, The Netherlands

13 <sup>b</sup>Technische Universität Darmstadt, Institute IWAR, Chair of Wastewater Engineering, 8

14 Franziska-Braun-Straße 7, 64287 Darmstadt, Germany

15 <sup>§</sup> Shared senior authorship

16  
17  
18 \*Correspondence: David G. Weissbrodt ([d.g.weissbrodt@tudelft.nl](mailto:d.g.weissbrodt@tudelft.nl))

## 19 Graphical Abstract

20

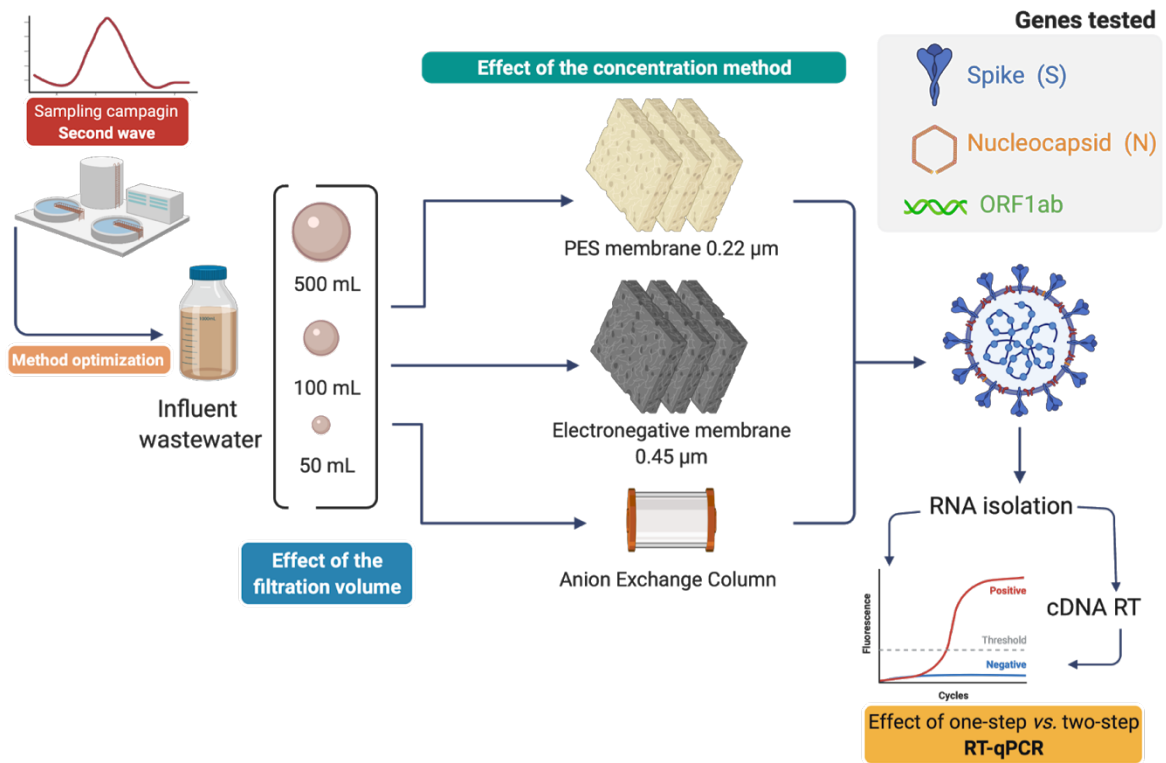

21

22

23

Created with BioRender

## 24 **Abstract**

25

26 The severe acute respiratory syndrome coronavirus 2 (SARS-CoV-2) pandemic has been one of  
27 the most difficult challenges humankind has recently faced. Wastewater-based epidemiology has  
28 emerged as a tool for surveillance and mitigation of potential viral outbreaks, circumventing biases  
29 introduced by clinical patient testing. Due to the situation urgency, protocols followed for isolating  
30 viral RNA from sewage were not adapted for such sample matrices. In parallel to their  
31 implementation for fast collection of data to sustain surveillance and mitigation decisions,  
32 molecular protocols need to be harmonized to deliver accurate, reproducible, and comparable  
33 analytical outputs. Here we studied analytical variabilities linked to viral RNA isolation methods  
34 from sewage. Three different influent wastewater volumes were used to assess the effect of filtered  
35 volumes (50, 100 or 500 mL) for capturing viral particles. Three different concentration strategies  
36 were tested by electronegative membranes, polyethersulfone membranes, and anion-exchange  
37 diethylaminoethyl cellulose columns. To compare the number of viral particles, different RNA  
38 isolation methods (column-based *vs.* magnetic beads) were compared. The effect of extra RNA  
39 purification steps and different RT-qPCR strategies (one step *vs.* two-step) were also evaluated.  
40 Results showed that the combination of 500 mL filtration volume through electronegative  
41 membranes and without multiple RNA purification steps (using column-based RNA purification)  
42 using two-step RT-qPCR avoided false negatives when basal viral load in sewage are present and  
43 yielded more consistent results during the surveillance done during the second-wave in Delft (The  
44 Hague area, The Netherlands). By paving the way for standardization of methods for the sampling,  
45 concentration and molecular detection of SARS-CoV-2 viruses from sewage, these findings can  
46 help water and health surveillance authorities to use and trust results coming from wastewater based  
47 epidemiology studies in order to anticipate SARS-CoV-2 outbreaks.

## 48 **1. Introduction**

49

50 In December 2019, China reported the outbreak of a novel coronavirus named SARS-CoV-2 (genus  
51 Betacoronavirus, family Coronaviridae), which has spread around the world fast and lethally. The  
52 progression of this SARS-CoV-2 pandemic has been monitored primarily by clinically testing  
53 symptomatic individuals for presence of viral RNA. However, as asymptomatic persons seem to  
54 account for 40 - 45% of the infections (Ooi and Low, 2020), registering solely symptomatic cases  
55 does not allow for prediction of the real cumulative incidence of the viral outbreak. In addition, the  
56 number of detected cases highly depends on access to diagnostics as well as the threat of isolation  
57 and quarantine dissuading people from getting tested. As SARS-CoV-2 RNA can be found in  
58 patients' stool, samples of rectal swabs, urine and other bodily fluids, detection of the virus via  
59 analysing wastewater has gained interest (Agrawal et al., 2021; Foladori et al., 2020; Kitajima et  
60 al., 2020; Medema et al., 2020b; Randazzo et al., 2020a; Wu et al., 2020).

61

62 Wastewater-based epidemiology can serve as a tool to trace the circulation of a virus variant within  
63 a community or municipality. It does not only protect the anonymity of community-members, but  
64 it is also unbiased and focused on real-time information, becoming an early-warning system for  
65 viral surveillance (Larsen and Wigginton, 2020). It can help make better-informed decisions in  
66 public health policies. The urgency of the pandemics pressed the need for a rapid deployment of  
67 available analytical methods to track the fate of the virus and its variants. This resulted in a large  
68 palette of different protocols for every step. For instance, sampling volumes used vary from a  
69 minimum of 2 mL (Rimoldi et al., 2020), to 45 - 60 mL (Hokajärvi et al., 2021; Westhaus et al.,  
70 2021), to 100-200 mL (Medema et al., 2020b; Tanhaei et al., 2021), up to 1L (Agrawal et al., 2021);  
71 concentration methods vary from precipitation, to centrifugation, ultrafiltration, conventional  
72 filtration, filtration by negatively charged membranes, and a combination of these approaches  
73 (Kitajima et al., 2020). There is a significant lack of quality controls, variable testing, and  
74 methodology improvement that would be necessary to confidently provide analytical accuracy. The  
75 global need for comparing virus levels across different communities underlines the need for a  
76 standardized workflow (Kitajima et al., 2020). Fortunately, different groups across the world are  
77 addressing this issue in order to overcome previous limitations. Protocol improvements have so far  
78 been focused in testing different RNA extraction methods (Ambrosi et al., 2021) and on improving  
79 the viral concentration steps (Parra Guardado et al., 2020). It has been previously mentioned that  
80 one of the variables that should be checked is the filtered volume: low sample volume in  
81 combination with low recovery yields could lead to false negative or lower measured SARS-CoV-  
82 2 concentration (Alygizakis et al., 2021).

83

84 Here, we aimed to establish a method to quantify SARS-CoV-2 from influent wastewater. The  
85 effects of filtration volumes of influent wastewater (50, 100 and 500 mL), different concentration  
86 methods (polyethersulfone membranes, electronegative membranes and anion-exchange  
87 chromatography), different RNA isolation methods (column based *vs.* magnetic beads), and  
88 different RT-qPCR strategies (one-step *vs.* two-step) were assessed. A methodology designed from  
89 the selected best parameter testing outputs was used to survey viral gene copies across the second  
90 wave of the pandemic in the Delfland water catchment area (The Hague, The Netherlands) and  
91 compare it to publicly available clinical data. We deliver an assessment of method variability and  
92 biases introduced when basal viral loads are present and establish a methodology implementable  
93 in wastewater-based epidemiology. This will support health and water authorities to anticipate,  
94 monitor, and control future outbreaks.

## 95 2. Material and Methods

96

97 A summary of the methodology can be found in **Figure 1**. In brief, municipal wastewater was  
98 collected to test the effect of 3 filtration volumes (50, 100, 500 mL) and 3 virus concentration  
99 methods (polyethersulfone membrane, electronegative membrane, anion exchange column) on  
100 molecular analyses of 3 genes (spike S, nucleocapsid N, ORF1ab) of SARS-CoV-2 by one-step  
101 and two-step reverse transcription (RT) and quantitative PCR (qPCR) after isolation of viral RNA  
102 using single (magnetic beads, columns) and multiple purification methods. The optimal method  
103 parameters were then applied to monitor a time series over the second wave of the epidemics.

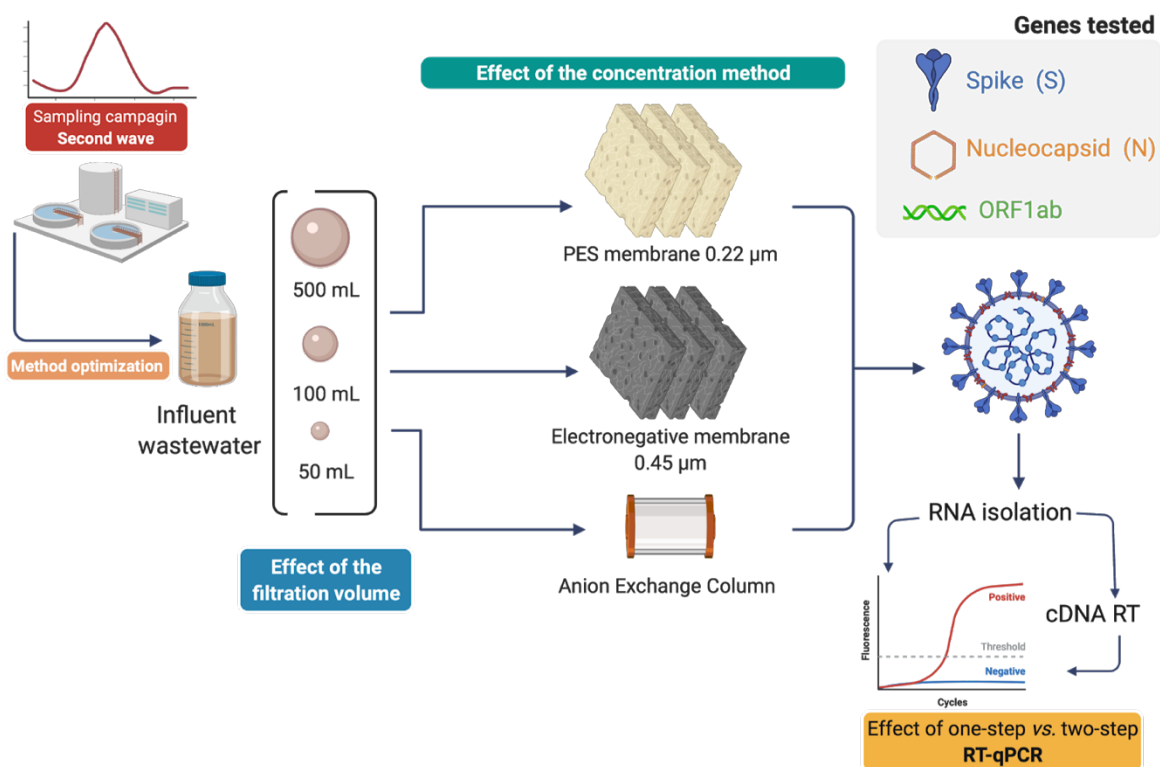

104

105

106 **Figure 1.** Schematic representation of the experimental design followed in this study. Viral genes (S, N and  
107 ORF1ab) were quantified by RT-qPCR (one-step vs two-step RT-qPCR) after testing the effect of the filtration  
108 volume and different concentration methods. Created with BioRender.

### 109 2.1. Sampling of influent water from WWTP

110 Influent wastewater was collected before primary treatment from WWTP Harnaspolder (Delft,  
111 The Netherlands). Volumes of 5 L from 24-h flow-proportional composite samples were collected  
112 per time point. Samples were obtained every 3 weeks over 6 months from July 7 to December 1,  
113 2020 covering the end of the first wave and the whole second wave of COVID-19 in The

114 Netherlands (**Figure 2**). The 24-composite sample from July 7 2020 was used for method  
115 development. All samples were processed in a timeframe of less than 1 day after collection.  
116

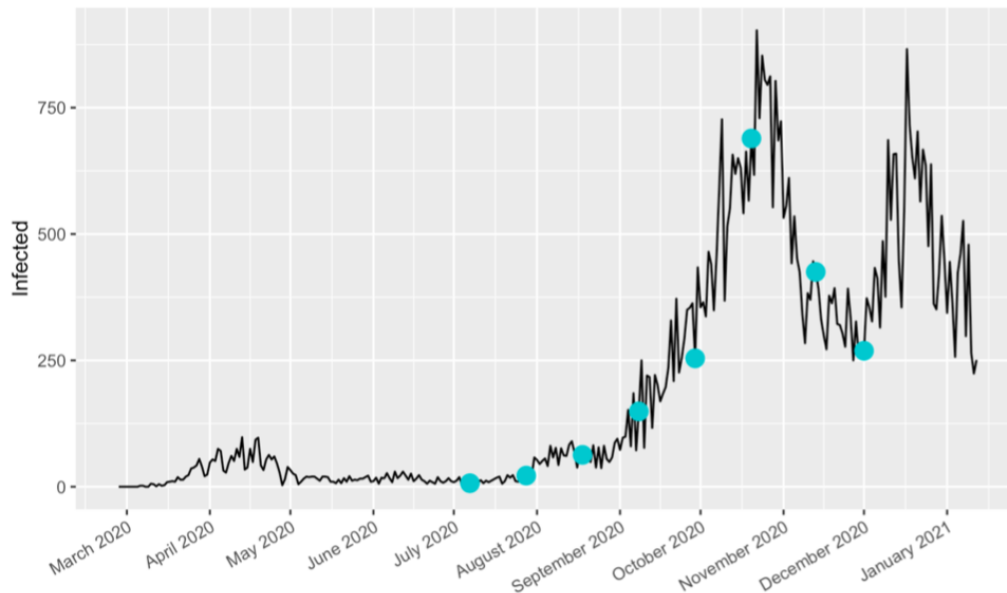

117  
118 **Figure 2.** Graphical representation of the number of positive cases of COVID-19 cases in The Hague area (black  
119 line) and the dates where samples were taken (blue dots) (Data source = Coronadashboard-RIVM  
120 <https://coronadashboard.rijksoverheid.nl>).

## 121 2.2. Deactivation of SARS-CoV-2

122 Influent wastewater samples were heated at 65°C for 30 minutes to deactivate and handle the  
123 sewage sample under biosafety conditions (Batéjat et al., 2021; Rabenau et al., 2005).

## 124 2.3. Concentration of SARS-CoV-2 from wastewater

125 The effect of used influent wastewater volume and the concentration method was assessed for viral  
126 genes quantification. A 24-h composite sample (July 7 2020) was used, representing the beginning  
127 of the second wave (**Figure 2**). The goal was to identify the best concentration method when basal  
128 viral levels were present in influent wastewater. A volume of 200  $\mu\text{L}$  ( $50 \text{ ng } \mu\text{L}^{-1}$ ) of an F-specific  
129 RNA MS2 phage (Thermo Fisher Scientific, Germany) was spiked as internal standard in the  
130 influent wastewater solution before the concentration methods. The group of F specific RNA  
131 phages (f2 and MS2 are the best known members of this group) are considered the most attractive  
132 subgroup of phages to serve as indicator organisms because their physical structure closely  
133 resembles that of enteroviruses in wastewater (Havelaar et al., 1985).

134 **2.3.1. Effect of the volume of influent wastewater used**

135 Volumes of 50, 100 and 500 mL of influent wastewater were tested. All the analyses were  
136 performed in three replicates.

137 **2.3.2. Effect of methods used to concentrate virus particles**

138 These influent wastewater volumes were filtered (membranes) or loaded (chromatographic  
139 column) in three technical replicates with three different methodologies: (i) filtration on  
140 polyethersulfone (PES) membrane of 0.22 µm pore size (Pall Corporation, USA); (ii) retention on  
141 a 1-mL diethylaminoethyl cellulose (DEAE) anion-exchange chromatography (BIA separations,  
142 Slovenia) which is used for phages separations (Kattur Venkatachalam et al., 2014; Kramberger et  
143 al., 2010) and for isolations of free-floating extracellular DNA from water matrices (Calderón-  
144 Franco et al., 2021); and (iii) attraction on electronegative membranes of 0.45 µm pore size (Merck  
145 Millipore, The Netherlands). Prior to loading on the DEAE chromatography column, the influent  
146 wastewater was filtered through the 0.22 µm PES to remove biosolids and particles, which is  
147 necessary to protect the DEAE column. Loading and elution in chromatography is more time  
148 consuming than direct filtration. However, chromatography is more selective and leads to higher  
149 grades of purity of concentrated analytes. Thus, we also considered the DEAE method as a way to  
150 identify the recovery of viral RNA when compared to the filtration methods.

151 **2.4. Effect of isolations and purifications of the RNA of SARS-CoV-2**

152 Extractions of raw viral RNA from membrane filters and DEAE column eluents were performed  
153 by using two different commercial kits for RNA extraction. First, we used the MagMax CORE  
154 Nucleic Acid Purification kit (Thermo Fisher Scientific, The Netherlands), that employ magnetic  
155 beads for nucleic acid purification, together with the MagMax CORE Mechanical Lysis Module  
156 (Thermo Fisher Scientific, The Netherlands) by following manufacturer's recommendations.  
157 Second, we used the Fast RNA Blue kit (MP Biomedicals), which is based on column-based  
158 purification (solid phase extraction), according to the manufacturer's protocol. In addition, the  
159 effect of multiple RNA purification steps before quantification of genes by RT-qPCR was assessed  
160 by involving the GeneJET NGS Cleanup Kit (Thermo Scientific, USA) according to  
161 manufacturer's instructions obtaining the purified RNA sample.

162

163 The quality and quantity of raw and purified RNA extracts were measured with a NanoDrop  
164 Spectrophotometer (ND-1000,USA).

165



## 166 **2.5. Effect of one-step vs. two-step RT-qPCR on detection of basal RNA concentrations**

167 On the lowest basal viral load day from our sampling campaign (7th July 2020), we compared one-  
168 step and two-step RT-qPCRs in order to assess the effect of quantification of viral RNA genes  
169 when the incidence of cases is low. This was assessed to avoid potential false negatives. One-step  
170 RT-qPCR was performed using the isolated RNA as a template (raw RNA), which included  
171 specific primers for the target genes. Two-step RT-qPCR was performed by synthesizing  
172 complementary DNA (cDNA) from the pool of raw RNA isolated per sample using the SuperScript  
173 VILO cDNA synthesis kit (Thermo Fisher Scientific, The Netherlands) following manufacturer's  
174 recommendations, included random primers, prior to using the cDNA as a template for qPCR. The  
175 concentration of the synthesized cDNA was measured with Qubit® dsDNA assays (Thermo Fisher  
176 Scientific, USA).

## 177 **2.6. Detection and quantification of SARS-CoV-2 RNA by RT-qPCR**

178 We quantified the concentration of SARS-CoV-2 RNA in wastewater samples by measuring  
179 marker genes using the TaqPath COVID-19 RT-PCR Kit (Thermo Fisher Scientific, Germany)  
180 with a QuantStudio 3 Thermal Cycler, according to a previous study (Agrawal et al., 2021). The  
181 TaqPath COVID-19 RT-PCR Kit includes primer pairs targeting genes that code for the structural  
182 transmembrane spike (S) glycoprotein and nucleocapsid (N) protein, and for the non-structural  
183 open reading frame of the replicase complex (ORF1ab) and that were used in a multiplex assay  
184 (**Table S1**). Details about the kit are provided in the Supplementary Information. Each qPCR run  
185 was performed in technical triplicates in reaction volumes of 50 µL, with 12.5 µL TaqPath 1-Step  
186 Multiplex Master Mix (4X), 2.5 µL COVID-19 Real Time PCR Assay Multiplex Diagnostic  
187 Solution, and 25 µL nuclease free water. To the reaction mix, 10 µL of purified and extracted viral  
188 RNA were added. Thermal profiles are provided in Supplementary Information (**Table S2**).  
189 Reactions were considered positive if the cycle threshold (CT) was below 40 cycles, otherwise  
190 negative (*i.e.*, no detection of the SARS-CoV-2 RNA in the sample). The lower limit of detection  
191 was 10 gene copies per RT-qPCR reaction.

## 192 **2.7. Statistics**

193 Statistical analyses were performed on all molecular datasets with R 3.5.1 ([R Foundation for](https://www.r-project.org/)  
194 [Statistical Computing., 2018](https://www.r-project.org/)) and RStudio (<https://www.rstudio.com/>). The RT-qPCR abundance  
195 data were analyzed in R using ggplot2 (v0.9.3.1).

### 196 **3. Results and Discussion**

197 The effect of different initial influent wastewater volumes (50, 100 and 500 mL), different viral  
198 concentration methods, different RNA purification methods, and different one-step/two-step RT-  
199 qPCR methods were assessed on a basal viral level timepoint (July 7 2020), corresponding to the  
200 beginning of the second wave (**Figure 2**) and to the lowest day in terms of cumulative incidence of  
201 COVID-19 cases. This timepoint served as reference for method standardization as basal viral load  
202 levels from influent wastewater samples. The selected methodology was further used for surveilling  
203 SARS-CoV-2 gene copies over the second wave (July to December 2020).

#### 204 **3.1. Electronegative membranes and larger volumes were optimal to quantify SARS-CoV-2** 205 **from sewage samples**

206 Among the three different methods tested to concentrate virus particles (electronegative  
207 membranes, PES membranes, DEAE column), concentration by electronegative membranes of  
208 0.44  $\mu\text{m}$  pore size was the only one displaying positive results in terms of detection of S, N, ORF1ab  
209 genes and MS2 phage control (**Figure 3**).

210

211 When PES membranes were used, SARS-CoV-2 was not detected from the cake, suggesting that  
212 there was no retention to the membrane. However, internal control MS2 phage, which was added  
213 prior to filtration, was detected in PES membrane. This difference may result from structural viral  
214 conformations such as particle sizes of 100 nm (SARS-CoV-2) vs. 20 nm (MS2) or if virus is  
215 enveloped (SARS-CoV-2) vs. non-enveloped (MS2), resulting in different bindings to the  
216 membrane materials (Rockey et al., 2020).

217

218 The permeate of PES membranes was subsequently loaded on a DEAE chromatographic column  
219 to verify if the SARS-CoV-2 virus particles could be adsorbed and isolated similar to phages  
220 (Kattur Venkatachalam et al., 2014; Kramberger et al., 2010) and free-floating exDNA (Calderón-  
221 Franco et al., 2021). However, the DEAE method did not result in concentrating SARS-CoV-2,  
222 suggesting that neither the PES membrane, nor the DEAE column is suitable for SARS-CoV-2  
223 concentration from wastewater.

224

225 SARS-CoV-2, among other viruses, has an isoelectric point ( $pI = \frac{1}{2} (pK_{a1} + pK_{a2})$ ) below 7. The  
226 pH of the influent wastewater pH ranged between 6.3 - 6.8. At pH values below the isoelectric  
227 point, the charge of SARS-CoV-2 and MS2 phage could be positive, thus explaining why they did

228 not bind to the DEAE (positive net charge) column and did bind to the electronegative membranes  
 229 (Joonaki et al., 2020).

230

231 When expressing the RT-qPCR results in concentrations of viral gene copies detected per L,  
 232 filtering 500 mL influent water through electronegative membranes gave, in average, higher values  
 233 of gene copies per L ( $7.2 \cdot 10^4 \pm 1.7 \cdot 10^4$  viral gene copies  $L^{-1}$ ) when compared to gene copies  
 234 obtained from 50 mL ( $7.4 \cdot 10^3 \pm 4.1 \cdot 10^3$  viral gene copies  $L^{-1}$ ) or 100 mL ( $3.0 \cdot 10^4 \pm 1.9 \cdot 10^4$  viral  
 235 gene copies  $L^{-1}$ ). In **Figure 3**, individual gene results were also more consistent when 500 mL were  
 236 filtered (S gene:  $5.6 \cdot 10^4 \pm 2.8 \cdot 10^4$  viral gene copies  $L^{-1}$ ; N gene:  $6.0 \cdot 10^4 \pm 2.6 \cdot 10^3$  viral gene copies  
 237  $L^{-1}$ ; ORF1ab gene:  $7.5 \cdot 10^4 \pm 2.4 \cdot 10^4$  viral gene copies  $L^{-1}$ ) when compared to filtered 50 mL (S  
 238 gene:  $1.3 \cdot 10^4 \pm 1.0 \cdot 10^4$  viral gene copies  $L^{-1}$ ; N gene:  $4.2 \cdot 10^3 \pm 2.3 \cdot 10^3$  viral gene copies  $L^{-1}$ ;  
 239 ORF1ab gene:  $6.9 \cdot 10^3 \pm 2.9 \cdot 10^3$  viral gene copies  $L^{-1}$ ) and 100 mL (S gene:  $5.2 \cdot 10^4 \pm 1.6 \cdot 10^4$  viral  
 240 gene copies  $L^{-1}$ ; N gene:  $9.7 \cdot 10^3 \pm 6.7 \cdot 10^3$  viral gene copies  $L^{-1}$ ; ORF1ab gene:  $2.9 \cdot 10^4 \pm 4.7 \cdot 10^3$   
 241 viral gene copies  $L^{-1}$ ).

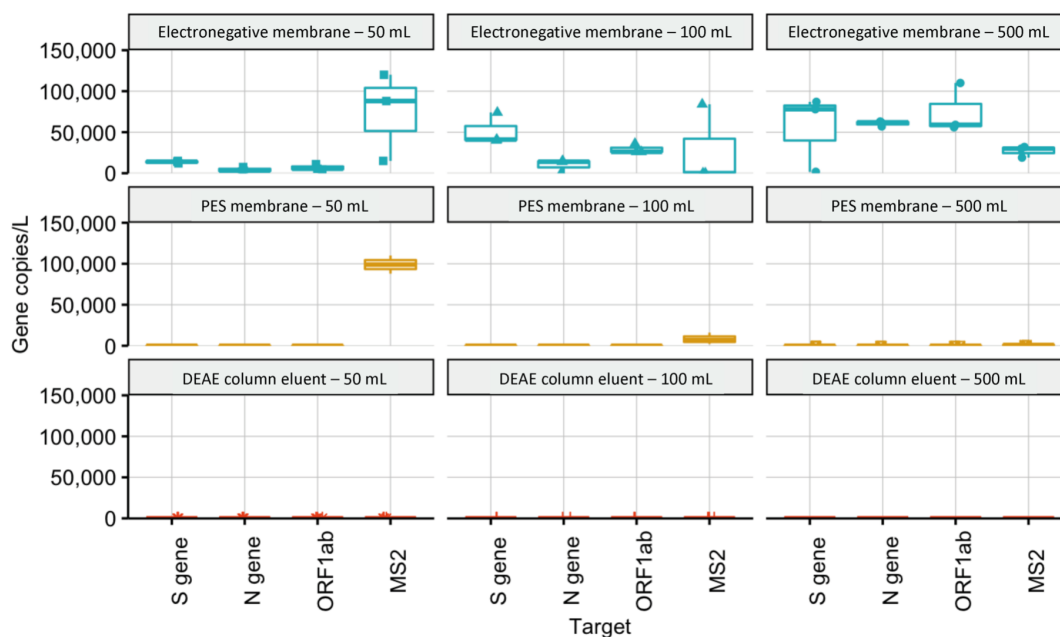

242 **Figure 3.** Concentration of SARS-CoV-2 RNA in influent wastewater as determined by the N, ORF1ab, S and MS2 control  
 243 gene assays in gene copies per liter, using different isolation methods (electronegative membranes filtration, polyethersulfone  
 244 membrane (PES) filtration and diethylaminoethyl cellulose (DEAE) column) and different initial volumes (50, 100 and 500  
 245 mL).  
 246

247 Here we demonstrated that filtration of larger volumes (*i.e.*, 500 mL) in combination of  
 248 electronegative membranes allowed, in the lowest day of COVID-19 incidence of the second wave,  
 249 to adsorb and concentrate enough SARS-CoV-2 for highest and most consistent (uniform results  
 250 among gene tested) detection and quantification by two-step RT-qPCR.  
 251

### 252 3.2. Avoiding multiple RNA purification steps and performing two-step RT-qPCR resulted 253 in higher viral quantification

254 One of the major analytical concerns related to the wastewater-based epidemiology of SARS-CoV-  
255 2 is the quality and purity of the isolated RNA, especially when low viral loads are present. This  
256 can potentially compromise the accuracy of the results obtained through false negatives. The effect  
257 of multiple RNA purification steps and one-step/two-step RT-qPCR strategies were assessed. The  
258 best concentration method obtained during the first phase of this study (*i.e.*, 500 mL influent  
259 wastewater filtered on electronegative membranes) was utilized.

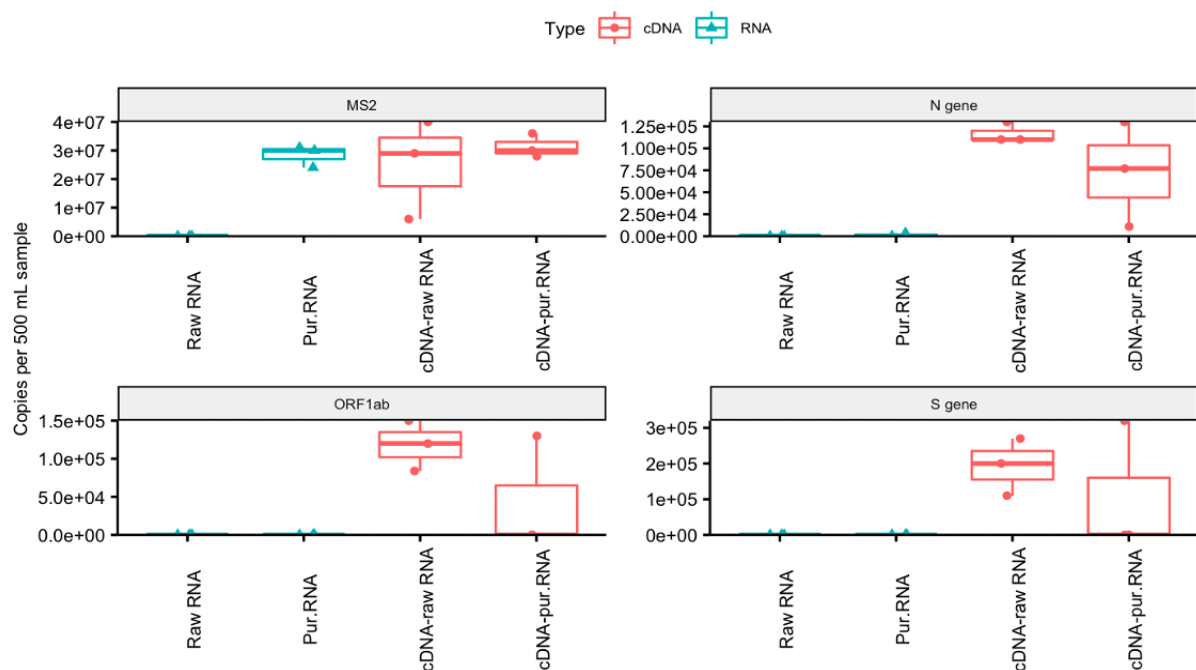

260 **Figure 4.** Concentration of SARS-CoV-2 RNA in influent wastewater as determined by the N, ORF1ab, S and MS2 control  
261 gene assays in gene copies per 500 mL, using one-step (raw RNA and purified RNA) and two-step (cDNA-raw RNA and  
262 cDNA-purified RNA) RT-qPCR.  
263

264 In **Figure 4**, it can be observed that for the three genes tested (N, ORF1ab and S), the two-step RT-  
265 qPCR performed from raw and purified RNA displayed, on average, higher values ( $1.6 \cdot 10^5 \pm$   
266  $1.0 \cdot 10^4$  viral gene copies  $500 \text{ mL}^{-1}$ ) than one-step RT-qPCR (no positive results from tested genes).  
267 No detection was obtained from one-step RT-qPCR both from raw RNA and purified RNA with  
268 the exception of the control MS2 sample, whereas one-step RT-qPCR from purified RNA resulted  
269 in the detection of  $2.9 \cdot 10^7 \pm 4.2 \cdot 10^6$  MS2 gene copies  $500 \text{ mL}^{-1}$ . Raw RNA obtained with magnetic  
270 beads contained high concentration of environmental inhibitors that made the binding between  
271 RNA and beads difficult during the processing of large volumes of influent wastewater, hampering  
272 the qPCR analysis (Graham et al., 2021; Kitajima et al., 2020; Schrader et al., 2012). This can affect  
273 the sensitivity of the assay and result in false-negative results (Ahmed et al., 2020).  
274

275

276 The three genes were consistently detected by two-step RT-qPCR from both raw RNA and purified  
277 RNA. However, RNA purification induced higher variability on the average of all the tested genes  
278 ( $1.7 \cdot 10^5 \pm 1.1 \cdot 10^5$  gene copies in 500 mL, 65% relative standard deviation (RSD)) when compared  
279 to the lower standard deviation obtained with two-step RT-qPCR ( $1.5 \cdot 10^5 \pm 3.7 \cdot 10^4$  gene copies in  
280 500 mL, 25% RSD). When individual genes were tested, the N gene exhibited the highest  
281 variability (2-fold) between raw ( $1.2 \cdot 10^5 \pm 8.0 \cdot 10^4$  gene copies in 500 mL) and purified ( $7.3 \cdot 10^4 \pm$   
282  $6.0 \cdot 10^4$  gene copies in 500 mL) RNA. Thus, multiple RNA purification stages before RT-qPCR are  
283 not recommended: RNA from viral particles were lost during the purification process even if  
284 detected with two-step RT-qPCR. The same trend was observed during the time course of the 6-  
285 months sampling campaign, where two-step RT-qPCR measurements displayed higher and more  
286 consistent results (*i.e.*, uniform values between the three tested genes) (**Figure S1**).

287

288 Our observation about how relevant it is to consider one-step *vs.* two-step RT-qPCR when viral  
289 load in wastewater samples is very low is in consensus with a previous study (Chik et al., 2021).  
290 This was of high importance as it was the day, from the sampling campaign, with the lowest viral  
291 load. Chik et al. (2021) also emphasize that, when the viral load is highly concentrated, the effect  
292 of one-step *vs.* two-step RT-qPCR is less relevant. However, assessing ways of quantifying RNA  
293 while avoiding false negatives are needed to get accurate values to sustain decisions to mitigate  
294 outbreaks. Chik et al. (2021) have performed collaborative inter-laboratory experiments where they  
295 spiked low and high levels of surrogate SARS-CoV-2 virus. They have observed less variation  
296 between laboratories when high-spike conditions were compared to the low-spike conditions. The  
297 Ct value Chik et al. (2021) obtained from analysis of the surrogates in the low-spike samples was  
298 not in the linear range of PCR amplification and approached the sensitivity limit. Therefore, it is  
299 recommended to: (1) avoid multiple RNA purification steps for reducing loss of the RNA; (2) and  
300 run a two-step RT-qPCR analysis, which allow enhancing the resolution. This is because cDNA is  
301 firstly synthesized from total viral RNA using random primers followed by specific primers for  
302 qPCR analysis, being able to detect low-levels of SARS-CoV-2 RNA copies in sewage.

### 303 **3.3. Wastewater-based epidemiology as a tool to anticipate viral outbreaks**

304 The range of commercial options to isolate RNA and quantify SARS-CoV-2 viral particles is  
305 diverse and complex. Two different RNA isolation methods were chosen to survey the number of  
306 viral particles over the sampling campaign (**Figure 5**): one column-based microbial RNA  
307 extraction kit (Fast RNA) and one magnetic beads-based kit (MagMax Core kit).

308

309 Comparative analysis between RNA extraction methods are displayed in **Figure 5**. Both methods  
310 showed similar results in terms of gene copies per liter (no significant difference;  $p > 0.05$ ) during  
311 the whole sampling campaign with the exception of October 20, 2020 ( $p < 0.05$ ), which happened  
312 to be the peak of the second wave. The column-based method resulted in less variation between  
313 replicates when compared to the magnetic beads method. Our results can be compared with the  
314 results from a previous measuring campaign performed in The Hague (Medema et al., 2020a),  
315 where results were reported as concentrations of N gene copies per mL on the first wave of the  
316 pandemics from February 2020 until August 2020. The results of July and August were in the range  
317 of  $10^4$ - $10^5$  viral N gene copies  $L^{-1}$ . The concentrations obtained with our optimized methodology  
318 are 10-fold higher ( $10^5$ - $10^6$  gene copies  $L^{-1}$ ) taking into account the average of these three genes  
319 (N, S and ORF1ab) than those obtained by Medema et al. (2020a). It allowed a more sensitive  
320 quantification of viral gene copies at the beginning of the pandemic second-wave.

321  
322 Early detection of SARS-CoV-2 and other future possible viral agents from wastewater requires  
323 accurate and adapted-to-matrix methodologies. Thus, being able to quantify low viral levels with  
324 non-clinical samples is an important factor to consider in wastewater-based epidemiology, as early  
325 communication to the competent authorities is necessary to have enough reaction time to prevent  
326 viral outbreaks in urban settlements.

327  
328 The concentrations measured matched with the COVID19 incidences reported by the National  
329 Institute for Public Health and Environment (RIVM, The Netherlands) and seemed to slightly  
330 anticipate by 1-2 weeks the start of the second wave. The second peak started to increase in the  
331 beginning of September 2020 while significant viral copies could already be quantified by August  
332 18, 2020 ( $1.73 \cdot 10^6$  viral gene copies  $L^{-1}$ ). This is in accordance with Larsen and Wigginton (2020),  
333 who have claimed that wastewater-based epidemiology remediates clinical biases that result from  
334 low access to isolation diagnostics and quarantine threat dissuading citizens from getting tested. It  
335 also helps understand the locations and dynamics of community transmissions, becoming a more  
336 cost-effective and less invasive method. Randazzo et al. (2020b) have highlighted the importance  
337 of wastewater-based epidemiology as an early indicator, revealing that members of the community  
338 were shedding SARS-CoV-2 RNA particles in their stool even before the first cases had been  
339 reported by the authorities in Murcia (Spain).

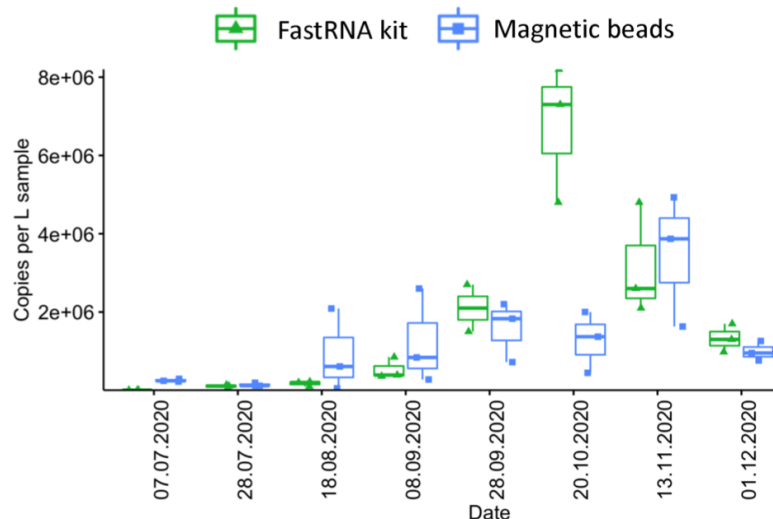

340  
341 **Figure 5.** Concentration of SARS-CoV-2 RNA in influent wastewater as determined by the average of N, ORF1ab and S  
342 gene assays in gene copies per L using two RNA extraction methods: FastRNA and MagMax (Magnetic beads) over the whole  
343 sampling campaign (July 2020 until December 2020) covering the second wave in The Netherlands.

344  
345 Overall, a global effort is necessary to generate, harmonize, and use standardized analytical  
346 protocols for an accurate, reproducible, and comparable detection and quantification of SARS-  
347 CoV-2 (Bivins et al., 2020). On a wastewater-based epidemiology basis, crucial considerations are  
348 needed from sampling to preparation and measurements in order to define (i) the sampling points,  
349 (ii) the sample size and frequency, (iii) the method to efficiently concentrate viral particles, (iv) the  
350 quantification methods used, (v) the primer set(s), (vi) the controls, and (vii) the normalization  
351 methods. Some initiatives on protocol standardization have been taken such as the NORMAN-  
352 SCORE joint initiative to facilitate data comparison between “SARS-CoV-2 in sewages” studies  
353 (Lundy et al., 2021). Knowing the inherent biases associated with qPCR analysis of wastewater  
354 samples due to the variability in the matrix of the samples (Agrawal et al., 2021; Chik et al., 2021)  
355 and the urgency of time, we believe that it is currently important to focus on the robustness and  
356 reproducibility of the qPCR method used in each respective lab, especially during low incidence  
357 values. Analytical robustness should help translate risk in the form of viral concentrations per  
358 volume filtered to react fast enough to minimize undesirable infective and spreading consequences.

## 359 **4. Conclusions**

360 Molecular sentinels require analytical accuracy for inter-comparison and information delivery.

361 From this work, we conclude that:

362

363 1. The higher the influent wastewater sample volume was (500 mL instead of 100 or 50 mL),  
364 the more uniform the concentrations of the three viral genes (N, S, ORF1ab) were,  
365 especially when low incidence were reported

366 2. Employing a two-step RT-qPCR method would help to enhance the resolution for samples  
367 with low viral loads.

368 3. Electronegative membranes were optimal and cheap for the concentration of SARS-CoV-  
369 2 from pre-settled influent wastewater.

370 4. Multiple RNA purification steps are not recommended, due to plausible loss of SARS-  
371 CoV-2 RNA and thereby, affecting qPCR analysis outcomes. While comparing the  
372 column-based vs. magnetic beads method for the RNA purification, we found that the  
373 column-based purification method displayed less variability amongst the biological  
374 triplicates throughout the sampling campaign than magnetic beads.



375 **Conflict of interests statement**

376 The authors declare no conflict of interest.

377 **Authors' contributions**

378 DCF, SA and DGW designed the study. DCF, SA and LO performed the experimental  
379 investigations. DCF wrote the manuscript with direct contribution, edits, and critical feedback by  
380 all authors.

381 **Acknowledgements**

382 We are grateful to Mariska Ronteltap from the Delfland Water Authority and Abdelmaoula Idrissi  
383 from Delfluent Services and WWTP Harnashpolder, The Netherlands, for helping us arrange this  
384 sampling campaign in such difficult moments, as well as Gertjan Medema from KWR and TU Delft  
385 for the comparison of results with the measurement campaign in The Hague. This work is part of  
386 the research project “Transmission of Antimicrobial Resistance Genes and Engineered DNA from  
387 Transgenic Biosystems in Nature” (Targetbio) funded by the program Biotechnology &  
388 Safety (grant no. 15812) of the Applied and Engineering Sciences Division of the Dutch Research  
389 Council (NWO).

## 390 **References**

- 391 Agrawal, S., Orschler, L., Lackner, S., 2021. Long-term monitoring of SARS-CoV-2 RNA in wastewater of the  
392 Frankfurt metropolitan area in Southern Germany. *Sci. Rep.* 11, 5372. [https://doi.org/10.1038/s41598-](https://doi.org/10.1038/s41598-021-84914-2)  
393 [021-84914-2](https://doi.org/10.1038/s41598-021-84914-2)
- 394 Ahmed, W., Bivins, A., Bertsch, P.M., Bibby, K., Choi, P.M., Farkas, K., Gyawali, P., Hamilton, K.A.,  
395 Haramoto, E., Kitajima, M., Simpson, S.L., Tandukar, S., Thomas, K. V., Mueller, J.F., 2020.  
396 Surveillance of SARS-CoV-2 RNA in wastewater: Methods optimization and quality control are crucial  
397 for generating reliable public health information. *Curr. Opin. Environ. Sci. Heal.* 17, 82–93.  
398 <https://doi.org/10.1016/j.coesh.2020.09.003>
- 399 Alygizakis, N., Markou, A.N., Rousis, N.I., Galani, A., Avgeris, M., Adamopoulos, P.G., Scorilas, A., Lianidou,  
400 E.S., Paraskevis, D., Tsiodras, S., Tsakris, A., Dimopoulos, M.A., Thomaidis, N.S., 2021. Analytical  
401 methodologies for the detection of SARS-CoV-2 in wastewater: Protocols and future perspectives. *TrAC -*  
402 *Trends Anal. Chem.* 134, 116125. <https://doi.org/10.1016/j.trac.2020.116125>
- 403 Ambrosi, C., Prezioso, C., Checconi, P., Scribano, D., Sarshar, M., Capannari, M., Tomino, C., Fini, M., Garaci,  
404 E., Palamara, A.T., De Chiara, G., Limongi, D., 2021. SARS-CoV-2: Comparative analysis of different  
405 RNA extraction methods. *J. Virol. Methods.* <https://doi.org/10.1016/j.jviromet.2020.114008>
- 406 Batéjat, C., Grassin, Q., Manuguerra, J.-C., Leclercq, I., 2021. Heat inactivation of the severe acute respiratory  
407 syndrome coronavirus 2. *J. Biosaf. Biosecurity* 3, 1–3. <https://doi.org/10.1016/j.jobb.2020.12.001>
- 408 Bivins, A., North, D., Ahmad, A., Ahmed, W., Alm, E., Been, F., Bhattacharya, P., Bijlsma, L., Boehm, A.B.,  
409 Brown, J., Buttiglieri, G., Calabro, V., Carducci, A., Castiglioni, S., Cetecioglu Gurol, Z., Chakraborty, S.,  
410 Costa, F., Curcio, S., De Los Reyes, F.L., Delgado Vela, J., Farkas, K., Fernandez-Casi, X., Gerba, C.,  
411 Gerrity, D., Girones, R., Gonzalez, R., Haramoto, E., Harris, A., Holden, P.A., Islam, M.T., Jones, D.L.,  
412 Kasprzyk-Hordern, B., Kitajima, M., Kotlarz, N., Kumar, M., Kuroda, K., La Rosa, G., Malpei, F.,  
413 Mautus, M., McLellan, S.L., Medema, G., Meschke, J.S., Mueller, J., Newton, R.J., Nilsson, D., Noble,  
414 R.T., Van Nuijs, A., Peccia, J., Perkins, T.A., Pickering, A.J., Rose, J., Sanchez, G., Smith, A., Stadler, L.,  
415 Stauber, C., Thomas, K., Van Der Voorn, T., Wigginton, K., Zhu, K., Bibby, K., 2020. Wastewater-Based  
416 Epidemiology: Global Collaborative to Maximize Contributions in the Fight against COVID-19. *Environ.*  
417 *Sci. Technol.* 54, 7754–7757. <https://doi.org/10.1021/acs.est.0c02388>
- 418 Calderón-Franco, D., van Loosdrecht, M.C.M., Abeel, T., Weissbrodt, D.G., 2021. Free-floating extracellular  
419 DNA: Systematic profiling of mobile genetic elements and antibiotic resistance from wastewater. *Water*  
420 *Res.* 189. <https://doi.org/10.1016/j.watres.2020.116592>
- 421 Chik, A.H.S., Glier, M.B., Servos, M., Mangat, C.S., Pang, X.L., Qiu, Y., D’Aoust, P.M., Burnet, J.B.,  
422 Delatolla, R., Dorner, S., Geng, Q., Giesy, J.P., McKay, R.M., Mulvey, M.R., Prystajecy, N., Srikanthan,  
423 N., Xie, Y., Conant, B., Hruday, S.E., 2021. Comparison of approaches to quantify SARS-CoV-2 in  
424 wastewater using RT-qPCR: Results and implications from a collaborative inter-laboratory study in  
425 Canada. *J. Environ. Sci. (China)* 107, 218–229. <https://doi.org/10.1016/j.jes.2021.01.029>
- 426 Foladori, P., Cutrupi, F., Segata, N., Manara, S., Pinto, F., Malpei, F., Bruni, L., La Rosa, G., 2020. SARS-CoV-  
427 2 from faeces to wastewater treatment: What do we know? A review. *Sci. Total Environ.*  
428 <https://doi.org/10.1016/j.scitotenv.2020.140444>
- 429 Graham, K.E., Loeb, S.K., Wolfe, M.K., Catoe, D., Sinnott-Armstrong, N., Kim, S., Yamahara, K.M.,

- 430 Sassoubre, L.M., Mendoza Grijalva, L.M., Roldan-Hernandez, L., Langenfeld, K., Wigginton, K.R.,  
431 Boehm, A.B., 2021. SARS-CoV-2 RNA in Wastewater Settled Solids Is Associated with COVID-19  
432 Cases in a Large Urban Sewershed. *Environ. Sci. Technol.* 55, 488–498.  
433 <https://doi.org/10.1021/acs.est.0c06191>
- 434 Havelaar, A.H., Hogeboom, W.M., Pot, R., 1985. F specific RNA bacteriophages in sewage: Methodology and  
435 occurrence. *Water Sci. Technol.* 17, 645–655. <https://doi.org/10.2166/wst.1985.0167>
- 436 Hokajärvi, A.M., Rytönen, A., Tiwari, A., Kauppinen, A., Oikarinen, S., Lehto, K.M., Kankaanpää, A.,  
437 Gunnar, T., Al-Hello, H., Blomqvist, S., Miettinen, I.T., Savolainen-Kopra, C., Pitkänen, T., 2021. The  
438 detection and stability of the SARS-CoV-2 RNA biomarkers in wastewater influent in Helsinki, Finland.  
439 *Sci. Total Environ.* 770, 145274. <https://doi.org/10.1016/j.scitotenv.2021.145274>
- 440 Joonaki, E., Hassanpouryouzband, A., Heldt, C.L., Areo, O., 2020. Surface Chemistry Can Unlock Drivers of  
441 Surface Stability of SARS-CoV-2 in a Variety of Environmental Conditions. *Chem.*  
442 <https://doi.org/10.1016/j.chempr.2020.08.001>
- 443 Kattur Venkatachalam, A.R., Szyporta, M., Kiener, T.K., Balraj, P., Kwang, J., 2014. Concentration and  
444 purification of enterovirus 71 using a weak anion-exchange monolithic column. *Virol. J.* 11, 1–8.  
445 <https://doi.org/10.1186/1743-422X-11-99>
- 446 Kitajima, M., Ahmed, W., Bibby, K., Carducci, A., Gerba, C.P., Hamilton, K.A., Haramoto, E., Rose, J.B.,  
447 2020. SARS-CoV-2 in wastewater: State of the knowledge and research needs. *Sci. Total Environ.*  
448 <https://doi.org/10.1016/j.scitotenv.2020.139076>
- 449 Kramberger, P., Honour, R.C., Herman, R.E., Smrekar, F., Peterka, M., 2010. Purification of the  
450 *Staphylococcus aureus* bacteriophages VDX-10 on methacrylate monoliths. *J. Virol. Methods* 166, 60–64.  
451 <https://doi.org/10.1016/j.jviromet.2010.02.020>
- 452 Larsen, D.A., Wigginton, K.R., 2020. Tracking COVID-19 with wastewater. *Nat. Biotechnol.* 38, 1151–1153.  
453 <https://doi.org/10.1038/s41587-020-0690-1>
- 454 Lundy, L., Fatta-Kassinos, D., Slobodnik, J., Karaolia, P., Cirka, L., Kreuzinger, N., Castiglioni, S., Bijlsma, L.,  
455 Dulio, V., Deviller, G., Lai, F.Y., Alygizakis, N., Barneo, M., Baz-Lomba, J.A., Béen, F., Cíhová, M.,  
456 Conde-Pérez, K., Covaci, A., Donner, E., Ficek, A., Hassard, F., Hedström, A., Hernandez, F., Janská, V.,  
457 Jellison, K., Hofman, J., Hill, K., Hong, P.-Y., Kasprzyk-Hordern, B., Kolarević, S., Krahulec, J.,  
458 Lambropoulou, D., de Llanos, R., Mackuľak, T., Martinez-García, L., Martínez, F., Medema, G.,  
459 Micsinai, A., Myrmel, M., Nasser, M., Niederstätter, H., Nozal, L., Oberacher, H., Očenášková, V.,  
460 Ogorzaly, L., Papadopoulos, D., Peinado, B., Pitkänen, T., Poza, M., Rumbo-Feal, S., Sánchez, M.B.,  
461 Székely, A.J., Soltysova, A., Thomaidis, N.S., Vallejo, J., van Nuijs, A., Ware, V., Viklander, M., 2021.  
462 Making Waves: Collaboration in the time of SARS-CoV-2 - rapid development of an international co-  
463 operation and wastewater surveillance database to support public health decision-making. *Water Res.* 199,  
464 117167. <https://doi.org/10.1016/j.watres.2021.117167>
- 465 Medema, G., Been, F., Ruijgers, H., KWR, 2020a. De SARS-CoV-2 rioolwatermonsters van 12 augustus. KWR  
466 [WWW Document]. Nieuws. URL <https://www.kwrwater.nl/actueel/de-nieuwste-rioolwatermonsters/>
- 467 Medema, G., Heijnen, L., Elsinga, G., Italiaander, R., Brouwer, A., 2020b. Presence of SARS-Coronavirus-2  
468 RNA in Sewage and Correlation with Reported COVID-19 Prevalence in the Early Stage of the Epidemic  
469 in the Netherlands. *Environ. Sci. Technol. Lett.* 7, 511–516. <https://doi.org/10.1021/acs.estlett.0c00357>

- 470 Ooi, E.E., Low, J.G., 2020. Asymptomatic SARS-CoV-2 infection. *Lancet Infect. Dis.*  
471 [https://doi.org/10.1016/S1473-3099\(20\)30460-6](https://doi.org/10.1016/S1473-3099(20)30460-6)
- 472 Parra Guardado, A.L., Sweeney, C.L., Hayes, E., Trueman, B.F., Huang, Y., Jamieson, R.C., Rand, J.L.,  
473 Gagnon, G.A., Stoddart, A.K., 2020. Development and optimization of a new method for direct extraction  
474 of SARS-CoV-2 RNA from municipal wastewater using magnetic beads. *medRxiv.*  
475 <https://doi.org/10.1101/2020.12.04.20237230>
- 476 Rabenau, H.F., Cinatl, J., Morgenstern, B., Bauer, G., Preiser, W., Doerr, H.W., 2005. Stability and inactivation  
477 of SARS coronavirus. *Med. Microbiol. Immunol.* 194, 1–6. <https://doi.org/10.1007/s00430-004-0219-0>
- 478 Randazzo, W., Cuevas-Ferrando, E., Sanjuán, R., Domingo-Calap, P., Sánchez, G., 2020a. Metropolitan  
479 wastewater analysis for COVID-19 epidemiological surveillance. *Int. J. Hyg. Environ. Health.*  
480 <https://doi.org/10.1016/j.ijheh.2020.113621>
- 481 Randazzo, W., Truchado, P., Cuevas-Ferrando, E., Simón, P., Allende, A., Sánchez, G., 2020b. SARS-CoV-2  
482 RNA in wastewater anticipated COVID-19 occurrence in a low prevalence area. *Water Res.* 181.  
483 <https://doi.org/10.1016/j.watres.2020.115942>
- 484 Rimoldi, S.G., Stefani, F., Gigantiello, A., Polesello, S., Comandatore, F., Mileto, D., Maresca, M., Longobardi,  
485 C., Mancon, A., Romeri, F., Pagani, C., Cappelli, F., Roscioli, C., Moja, L., Gismondo, M.R., Salerno, F.,  
486 2020. Presence and infectivity of SARS-CoV-2 virus in wastewaters and rivers. *Sci. Total Environ.* 744.  
487 <https://doi.org/10.1016/j.scitotenv.2020.140911>
- 488 Rockey, N., Arts, P.J., Li, L., Harrison, K.R., Langenfeld, K., Fitzsimmons, W.J., Lauring, A.S., Love, N.G.,  
489 Kaye, K.S., Raskin, L., Roberts, W.W., Hegarty, B., Wigginton, K.R., 2020. Humidity and deposition  
490 solution play a critical role in virus inactivation by heat treatment on N95 respirators. *medRxiv* 5, 1–14.  
491 <https://doi.org/10.1101/2020.06.22.20137448>
- 492 Schrader, C., Schielke, A., Ellerbroek, L., Johne, R., 2012. PCR inhibitors - occurrence, properties and removal.  
493 *J. Appl. Microbiol.* 113, 1014–1026. <https://doi.org/10.1111/j.1365-2672.2012.05384.x>
- 494 Tanhaei, M., Mohebbi, S.R., Hosseini, S.M., Rafieepoor, M., Kazemian, S., Ghaemi, A., Shamloei, S., Mirjalali,  
495 H., Asadzadeh Aghdaei, H., Zali, M.R., 2021. The first detection of SARS-CoV-2 RNA in the wastewater  
496 of Tehran, Iran. *Environ. Sci. Pollut. Res.* <https://doi.org/10.1007/s11356-021-13393-9>
- 497 Westhaus, S., Weber, F.A., Schiwy, S., Linnemann, V., Brinkmann, M., Widera, M., Greve, C., Janke, A.,  
498 Hollert, H., Wintgens, T., Ciesek, S., 2021. Detection of SARS-CoV-2 in raw and treated wastewater in  
499 Germany – Suitability for COVID-19 surveillance and potential transmission risks. *Sci. Total Environ.*  
500 751, 141750. <https://doi.org/10.1016/j.scitotenv.2020.141750>
- 501 Wu, F., Zhang, J., Xiao, A., Gu, X., Lee, W.L., Armas, F., Kauffman, K., Hanage, W., Matus, M., Ghaeli, N.,  
502 Endo, N., Duvallet, C., Poyet, M., Moniz, K., Washburne, A.D., Erickson, T.B., Chai, P.R., Thompson, J.,  
503 Alm, E.J., 2020. SARS-CoV-2 Titers in Wastewater Are Higher than Expected from Clinically Confirmed  
504 Cases. *mSystems.* <https://doi.org/10.1128/msystems.00614-20>  
505

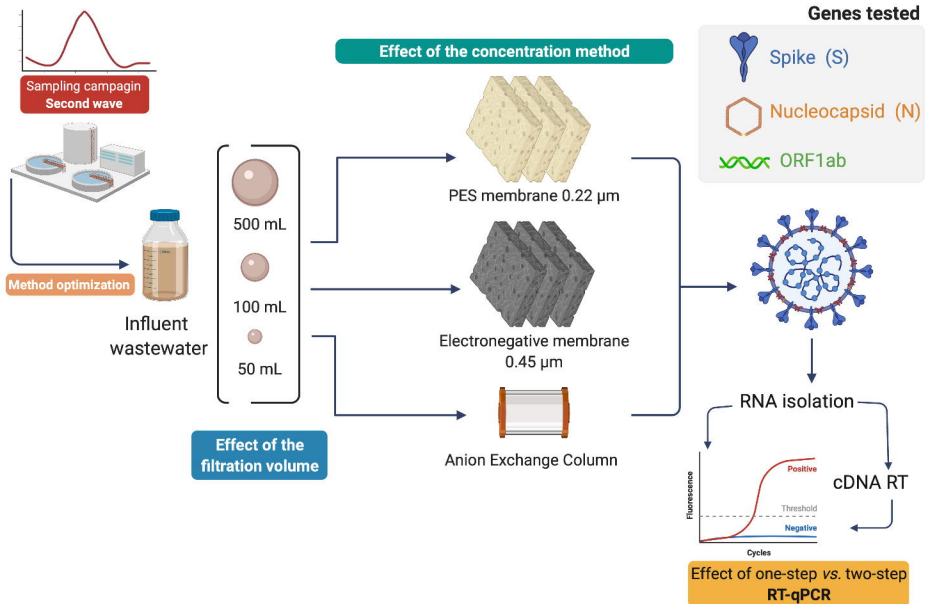

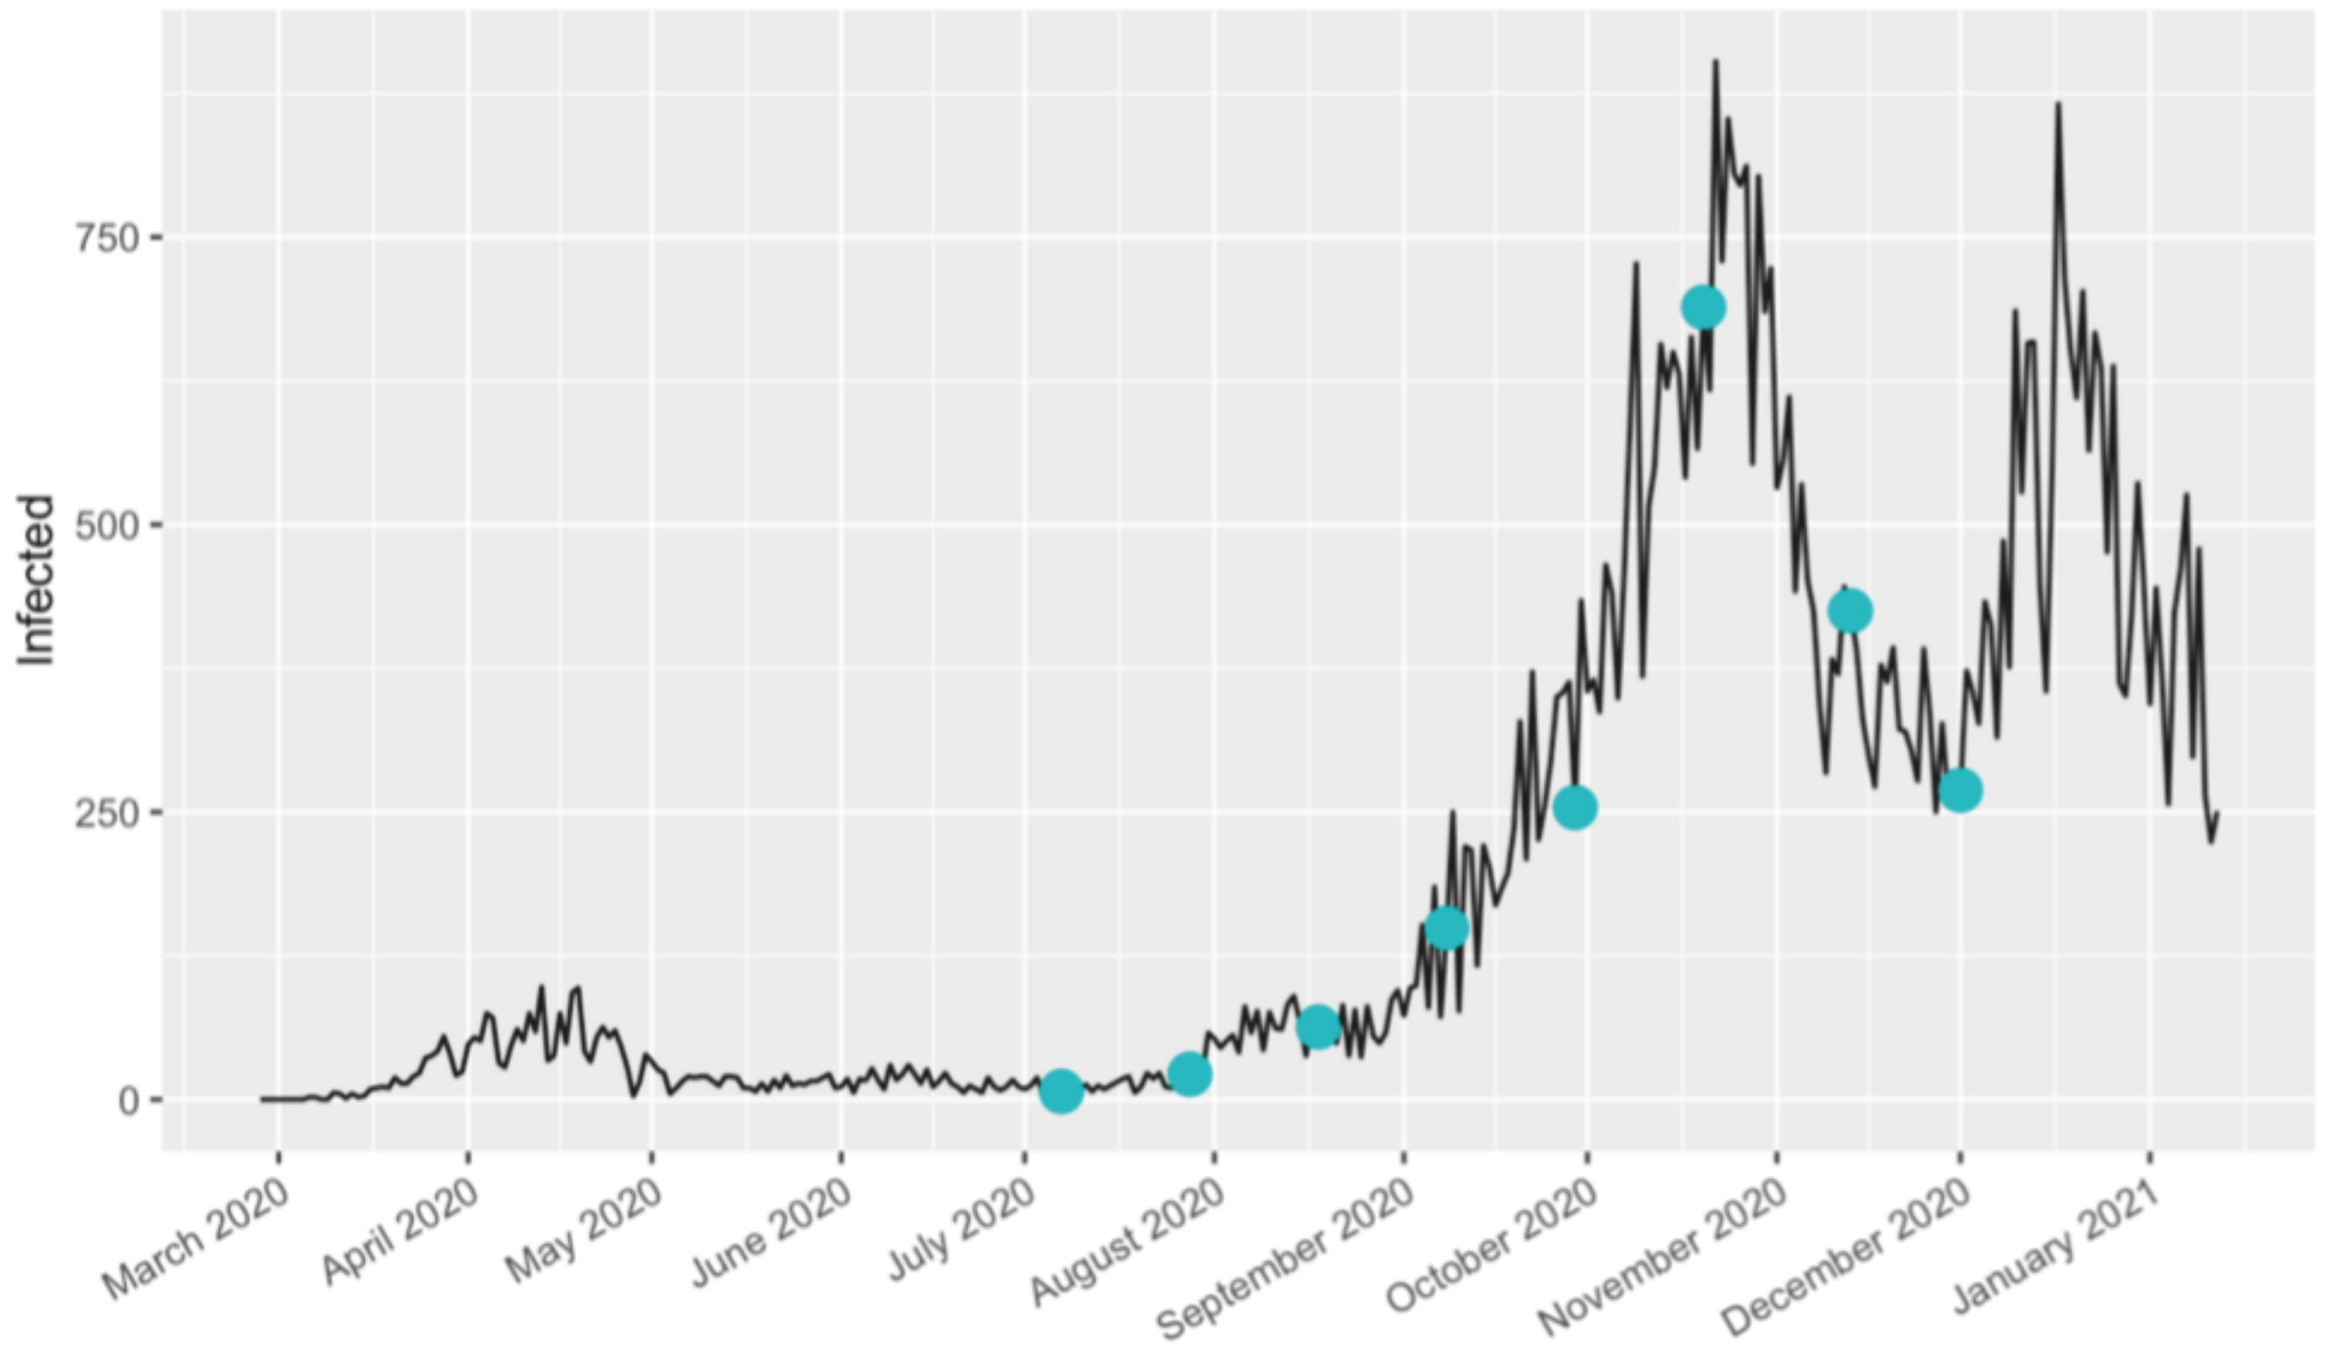

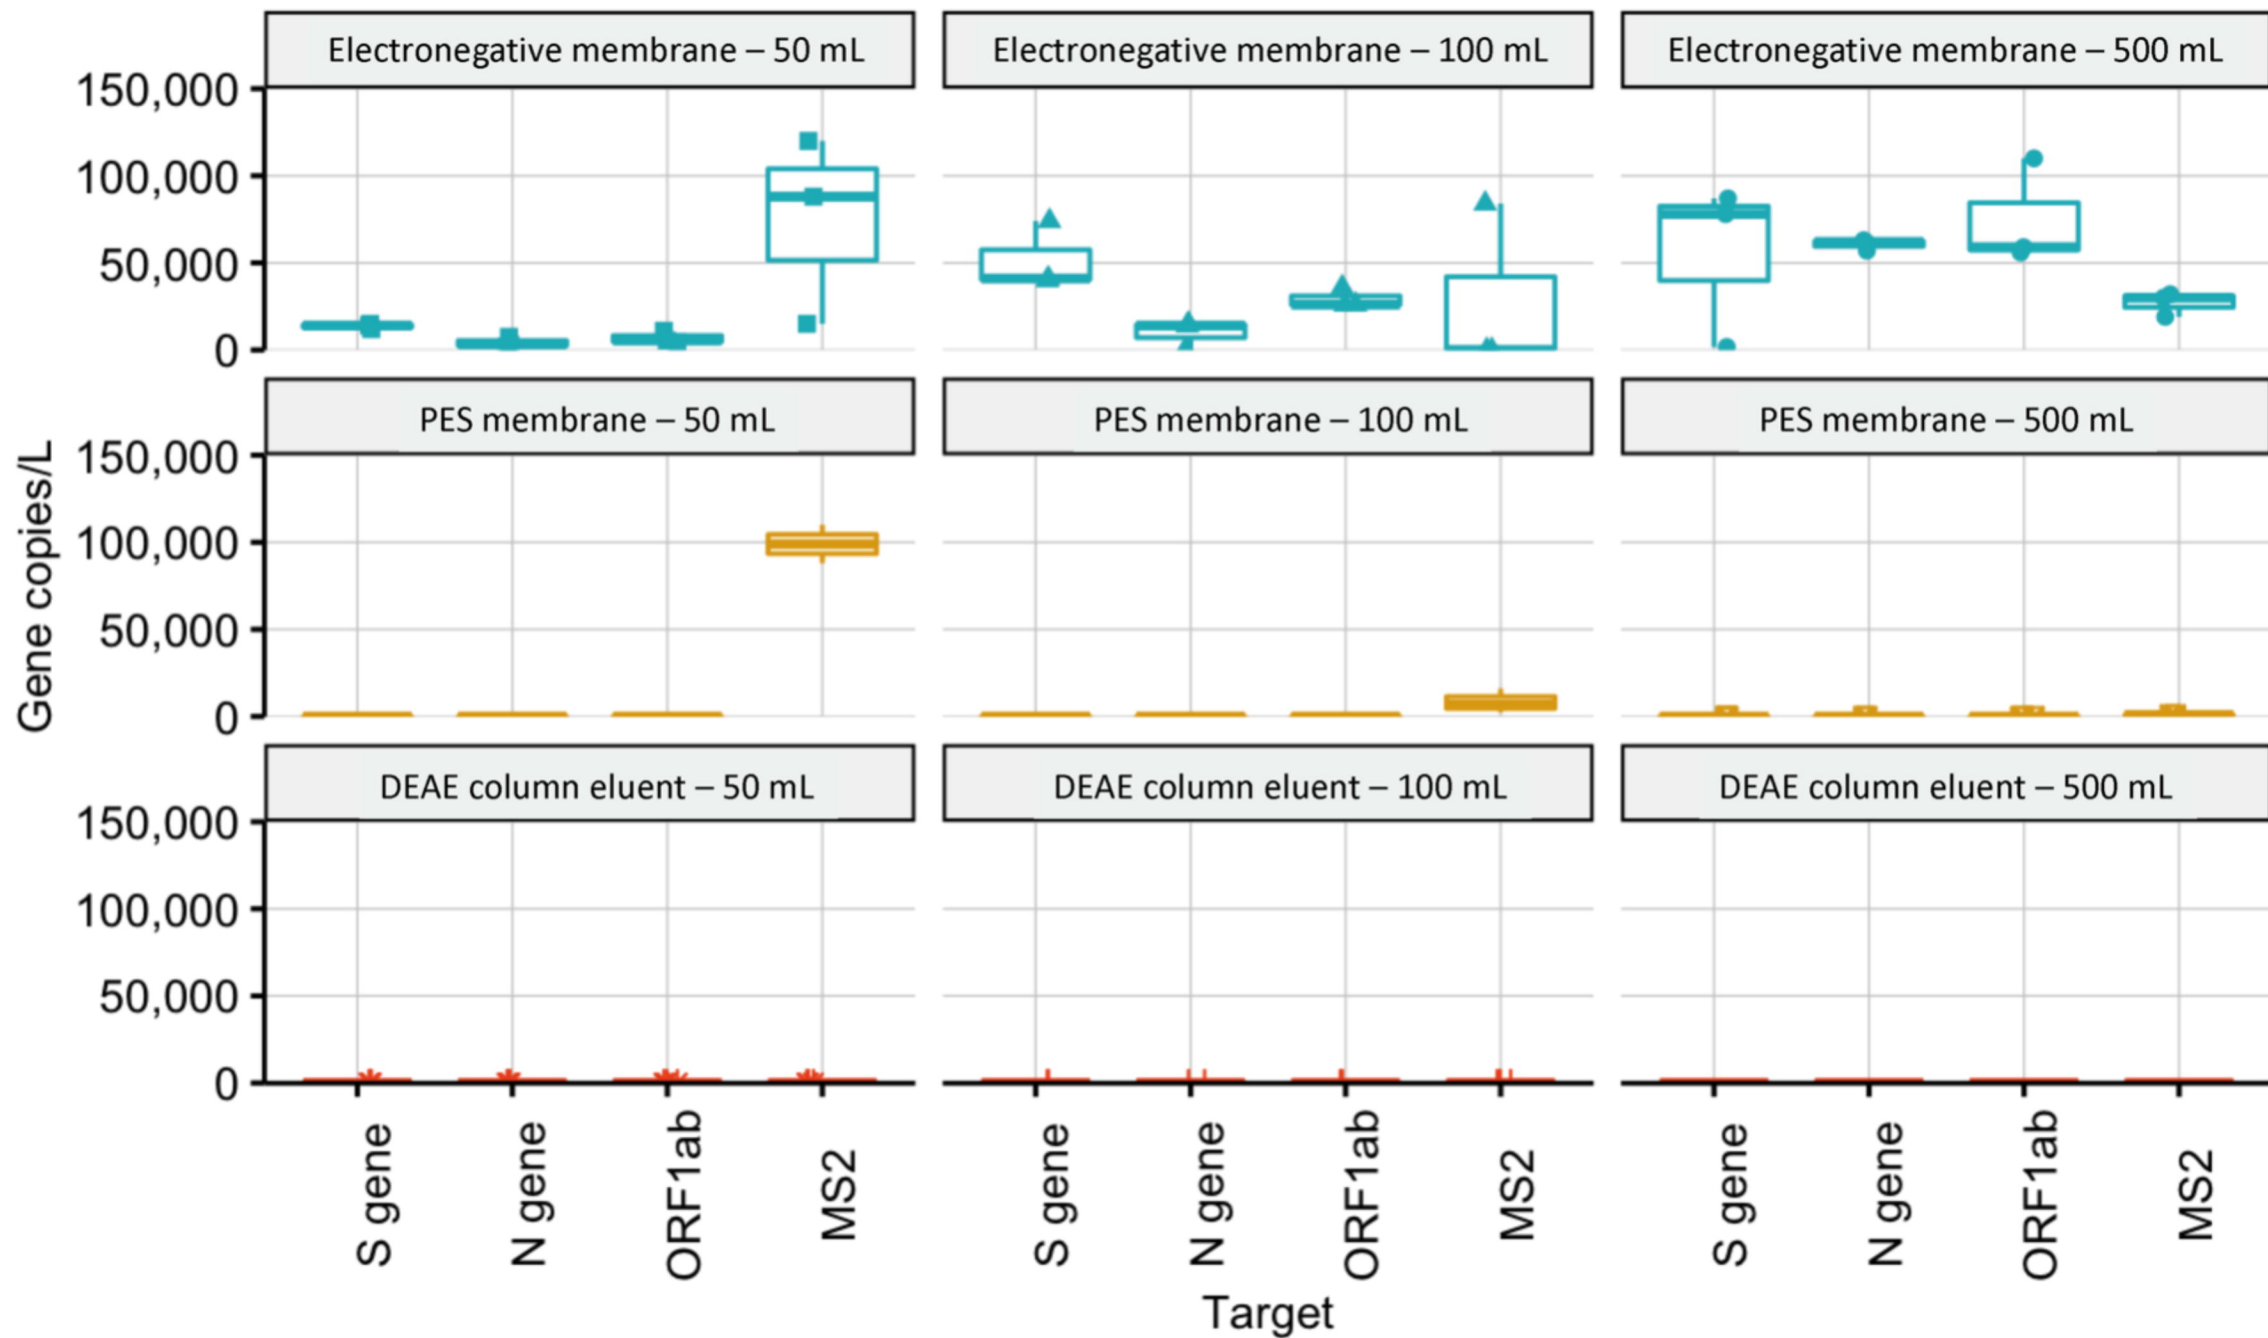

Type  cDNA  RNA

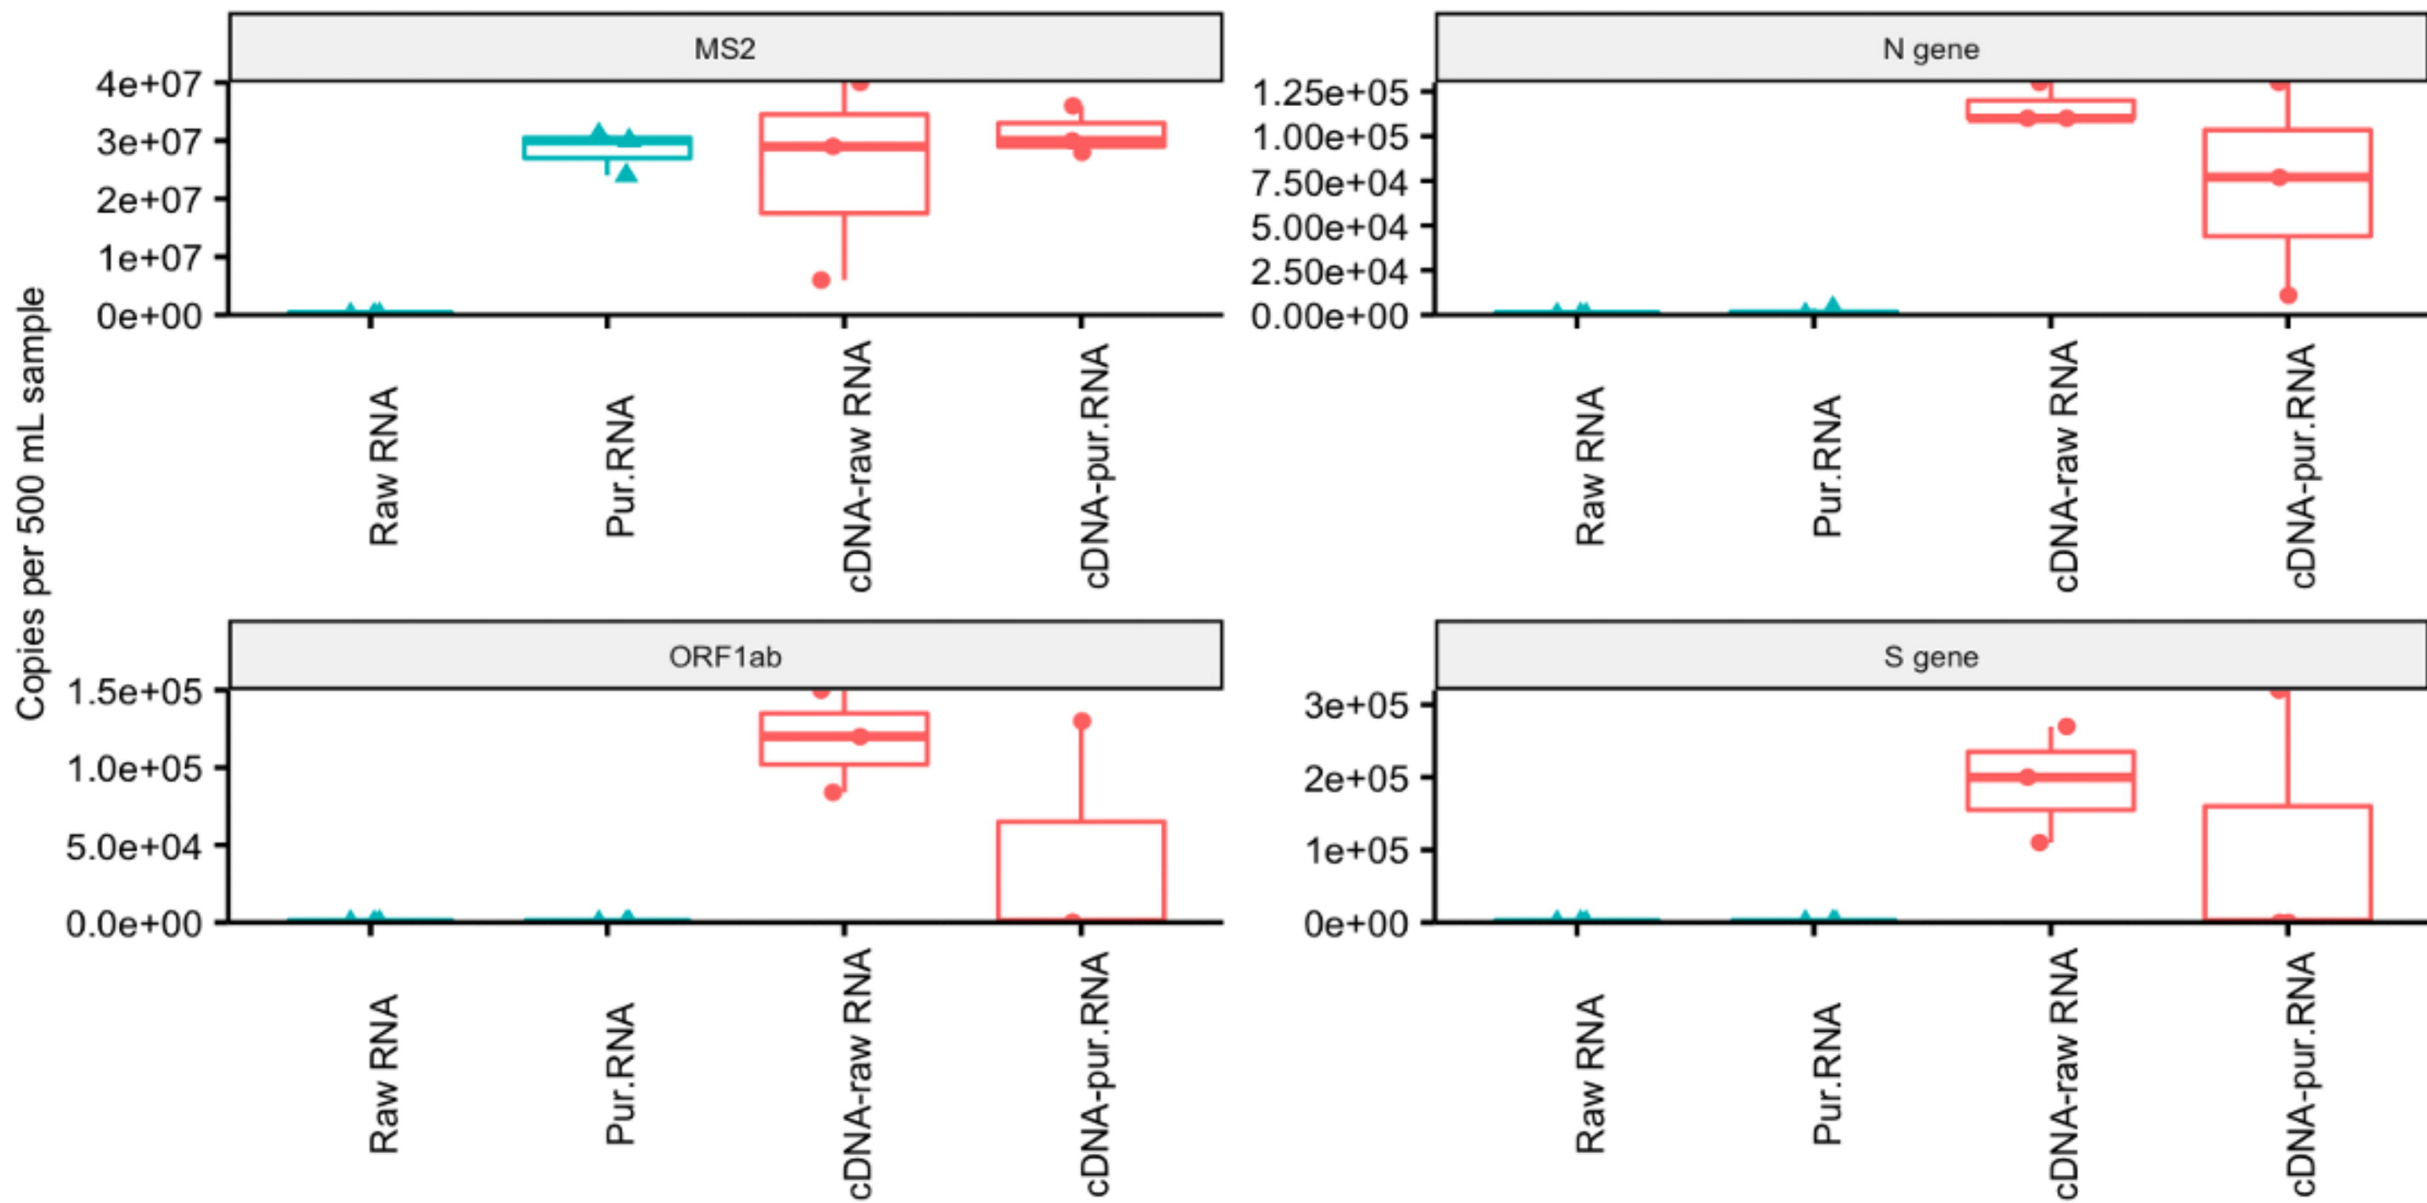



FastRNA kit      Magnetic beads

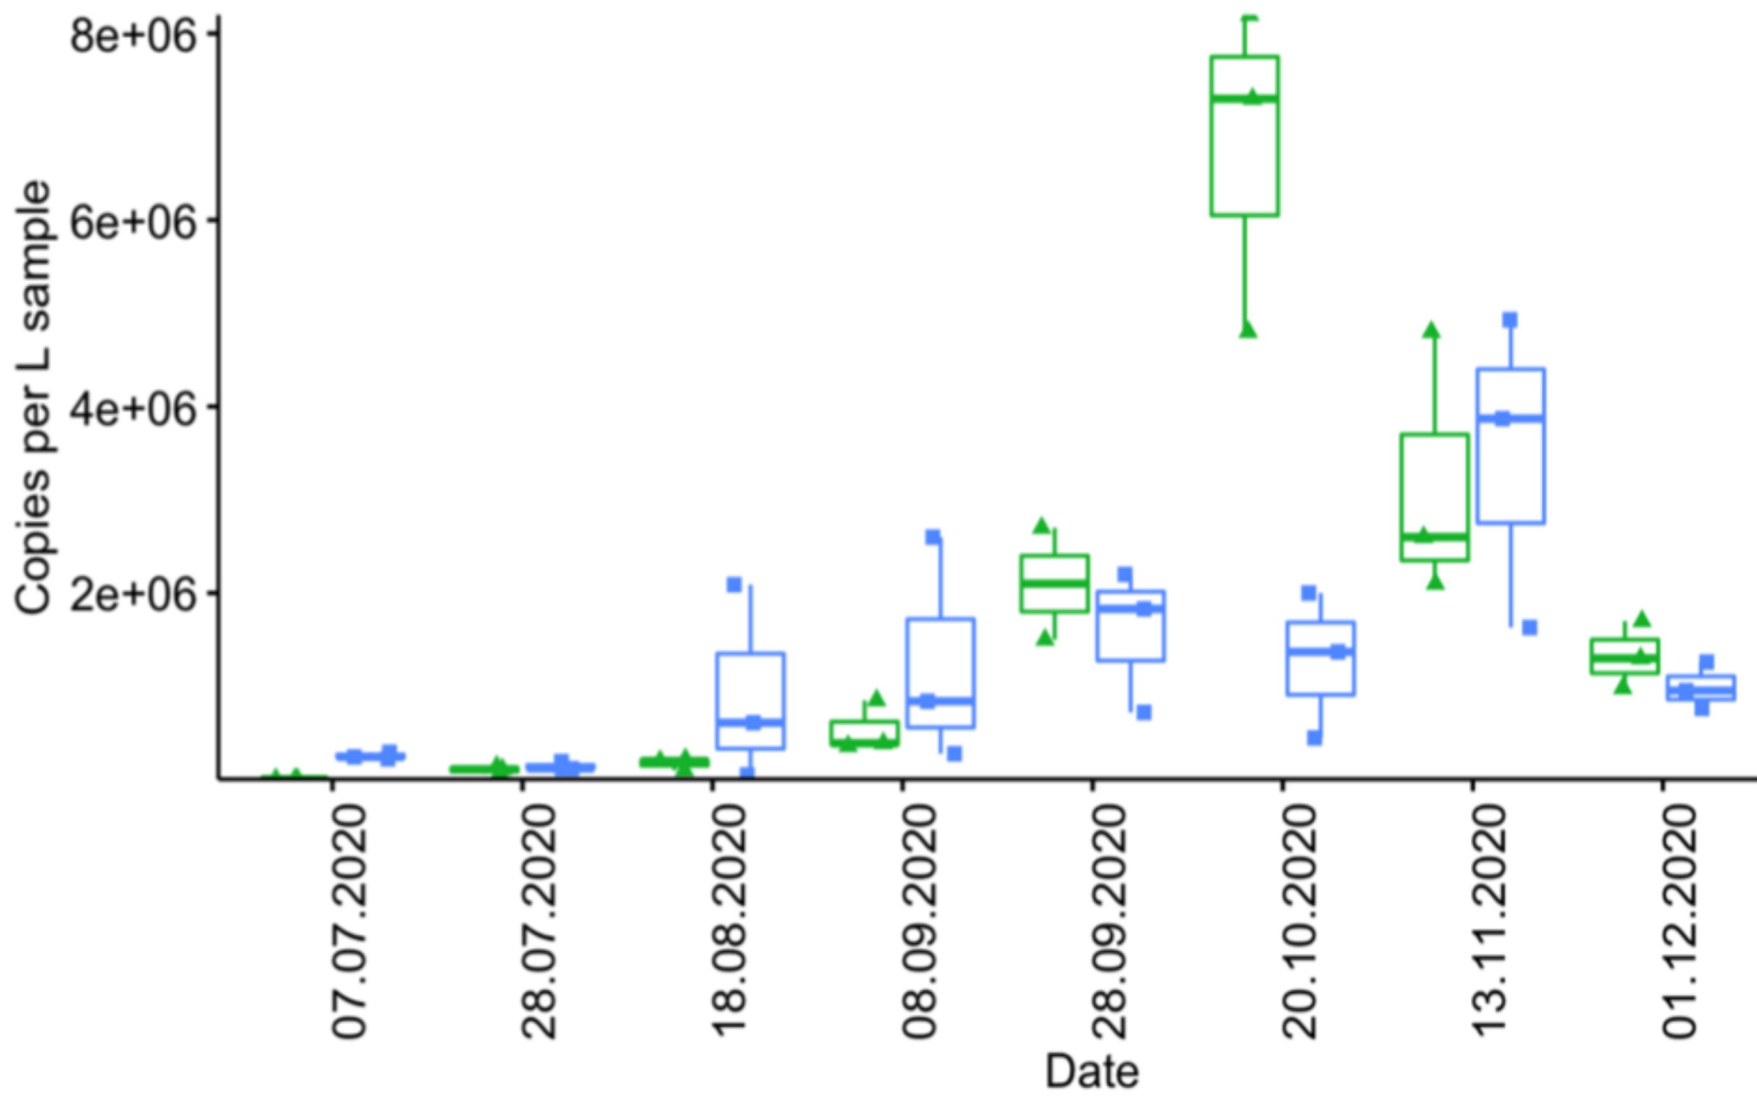

Source: https://medrxiv.org/content/10.1101/2021.06.30.21259751v1.full.pdf
